# Supplementary material for: Nuclear Ssr4 Is Required for the In Vitro and In Vivo Asexual Cycles and Global Gene Activity of Beauveria bassiana
Source: PubMed Central journal article supplement (PMC7174636; doi:10.1128/msystems.00677-19), 2020-04-21
Supplement: mSystems.00677-19-st002.pdf [file mSystems.00677-19-st002.pdf]

| Primers    | Paired sequences (5'–3')*                                                                                                 | Purpose                                                                    |
|------------|---------------------------------------------------------------------------------------------------------------------------|----------------------------------------------------------------------------|
| cSsr4-F/R  | ATGGACGAGCTGTACAAGATGGCGCAACAACCCGAC / CTGCAGGTCGACGGA<br>TCCCTATTCTTGCCCTCGCC                                            | Cloning <i>ssr4</i> cDNA (2103 bp) for fusion of <i>ssr4</i> to <i>GFP</i> |
| Ssr4up-F/R | TGGGCCGGCGCGCCGAATTCAGGTTGCCGACAAAGAGGC / TGGCTGCAGGT<br>CGACGGATCCACGTCCGCGATCCAAGT                                      | Cloning <i>ssr4</i> 5' fragment (1260 bp) for <i>ssr4</i> deletion         |
| Ssr4dn-F/R | GACCCATGGCTCGAGTCTAGACGTTTCGATACCCAATAGC / GTGGCTAGCGTTA<br>ACACTAGTGGAGGAGGAATCTGATAGCC                                  | Cloning <i>ssr4</i> 3' fragment (1381 bp) for <i>ssr4</i> deletion         |
| Ssr4fl-F/R | <u>gggg</u> ACCAC TTTGTACAAGAAAGCTGGGTCTATTCTTGCCCTCGCCCGG / <u>gggg</u><br>ACAAGTTTGTACAAAAAAGCAGGCTGCCGTTGCGGTTCTTGTCTT | Cloning full-length <i>ssr4</i> (3833 bp) for <i>ssr4</i> complementation  |
| pSsr4-F/R  | GATGCGATTTCTCGGTGAG / GCGGAGGTCGTGTTGTAG                                                                                  | PCR detecting <i>ssr4</i>                                                  |
| spSsr4-F/R | CCTCAAGGCTGGCTACATC / CTTCGTCGTCATCCATAACAT                                                                               | Southern probe of <i>ssr4</i> (461 bp)                                     |
| qSsr4-F/R  | AATACATTGCGTCCACAGAA / GAGCCCTCCTGAACTTG                                                                                  | qPCR detecting <i>ssr4</i>                                                 |
| q18S-F/R   | TGGTTTCTAGGACCGCCGTAA / CCTTGGCAAATGCTTTCGC                                                                               | qPCR detecting 18S RNA                                                     |
| qHyd1-F/R  | TTCTCAGCGATCTTGATCTT / GCACTTGTTGTCGATTGG                                                                                 | qPCR detecting <i>hyd1</i>                                                 |
| qHyd2-F/R  | CATGGTGAAAGGATCTG / ATCTTGGTCGTCTTCTCG                                                                                    | qPCR detecting <i>hyd2</i>                                                 |
| qHyd3-F/R  | GATATTACAGGCGGCAAT / TGACCACCAGGAATAGAG                                                                                   | qPCR detecting <i>hyd3</i>                                                 |
| qHyd4-F/R  | CGTCTTTGCTTCTCTCAT / AATTCATCTGCGTTACGA                                                                                   | qPCR detecting <i>hyd4</i>                                                 |
| qHyd5-F/R  | ATGAAGTTCTTTGCTATCG / CAGACAAGGTTGGAGTAG                                                                                  | qPCR detecting <i>hyd5</i>                                                 |

\* Underlined regions denote the restriction enzyme sites for homogeneous recombination of *ssr4* 5' and 3' fragments for the deletion of *ssr4* (*EcoRI/BamHI* and *XbaI/SpeI*) or the fragments of gateway exchange for *ssr4* complementation. Genomic tag loci of five hydrophobin genes (*hyd1–5*) are BBA\_06599, BBA\_03015, BBA\_00530, BBA\_03071 and BBA\_02999 under the NCBI accession NZ\_ADAH00000000, respectively
